# Supplementary material for: Forced expression of the non-coding RNA miR-17∼92 restores activation and function in CD28-deficient CD4+ T cells
Source: PubMed Central journal article supplement — iScience. 2022 Oct 17;25(11):105372. doi: 10.1016/j.isci.2022.105372 (PMC9646923; doi:10.1016/j.isci.2022.105372), 2022-10-17
Supplement: mmc1.pdf [file mmc1.pdf]

iScience, Volume 25

## **Supplemental information**

### **Forced expression of the non-coding RNA miR-17~92 restores activation and function in CD28-deficient CD4<sup>+</sup> T cells**

**Marianne Dölz, Marko Hasiuk, John D. Gagnon, Mara Kornete, Romina Marone, Glenn Bantug, Robin Kageyama, Christoph Hess, K. Mark Ansel, Denis Seyres, Julien Roux, and Lukas T. Jeker**

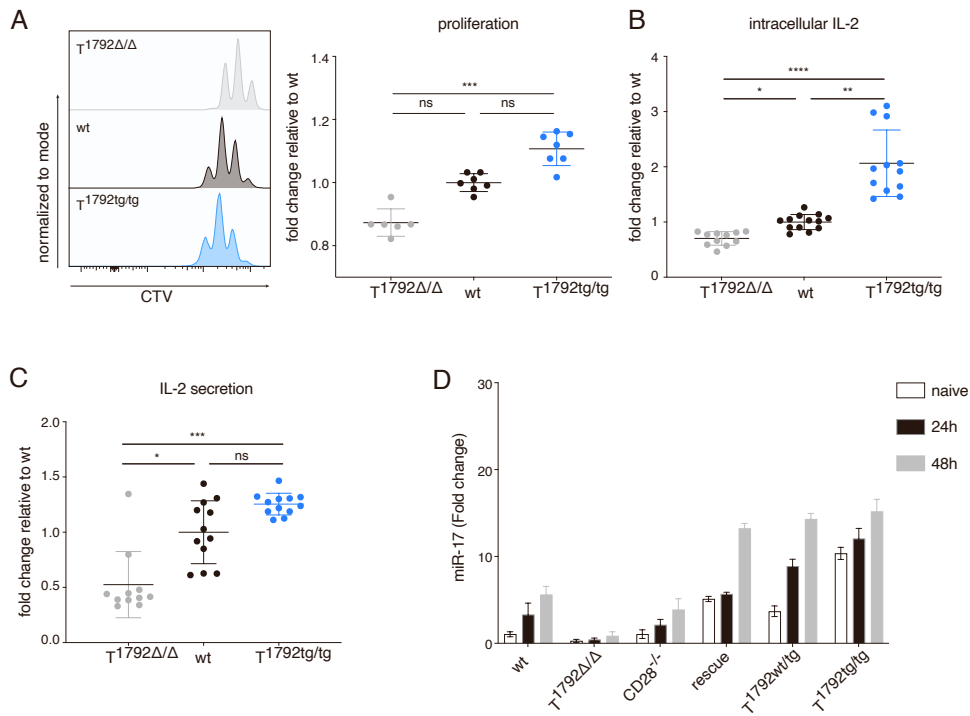

**Figure S1. MiR-17~92 regulates T cell proliferation and Interleukin-2 production, Related to Figure 1**

A) Proliferation of CTV labelled  $T^{1792\Delta/\Delta}$  (grey), wt (black) and  $T^{1792tg/tg}$  (light blue)  $CD4^+$  T cells activated for 48h with plate-bound anti-CD3/anti-CD28 mAbs. B) Quantification of flow cytometric intracellular IL-2 staining in  $CD4^+$  cells stimulated for 3h with PMA/Iono/BFA. C) IL-2 secretion measured by ELISA in culture supernatants at 48h. Data represent 2-3 independent experiments with 3-4 biological replicates per group. D) miR-17 expression of different genotypes and timepoints as indicated, assessed by quantitative PCR. Data from an experiment with 3-9 biological replicates per condition. Error bars show mean  $\pm$ SD, Dunn's multiple comparison test, p values: ns=not significant, \* $<0.05$  \*\* $<0.002$  \*\*\* $<0.0002$  \*\*\*\* $<0.0001$ .

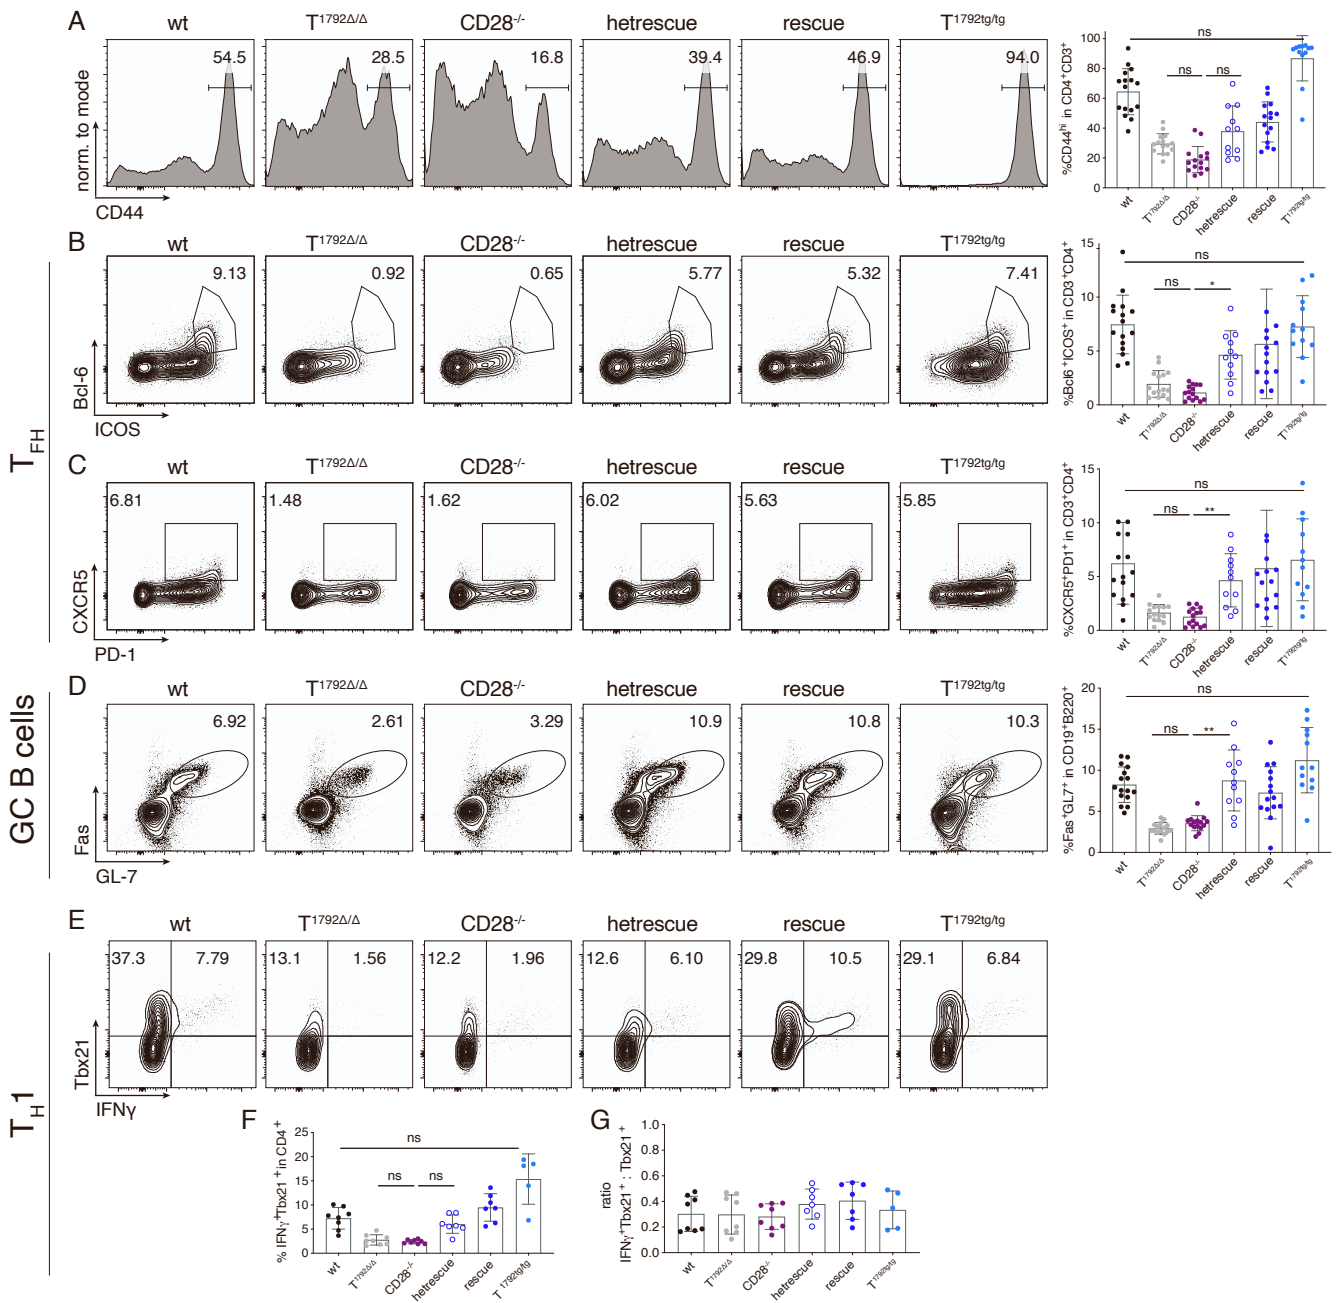

**Figure S2. MiR-17~92-mediated gene regulation is very sensitive to precise miR-17~92 expression in vivo, Related to Figure 2**

6-8 week old mice were infected with  $2 \times 10^5$  PFU LCMV Armstrong and spleens were analyzed at d8 post infection. wt (black), T<sup>1792Δ/Δ</sup> (grey), CD28<sup>-/-</sup> (purple), CD28<sup>-/-</sup> with heterozygous transgenic miR-17~92 expression (hetrescue; dark blue empty circles), CD28<sup>-/-</sup> with homozygous transgenic miR-17~92 expression (rescue; dark blue), T<sup>1792tg/tg</sup> (light blue). A-D) represent data from 4 independent experiments with 3-4 mice per group, gated on viable CD4<sup>+</sup>CD3<sup>+</sup> or viable CD19<sup>+</sup>B220<sup>+</sup> cells. Representative FACS plots and quantification of relative numbers of A) CD44 expression, B) quantification of % Bcl6<sup>+</sup>ICOS<sup>+</sup> (T<sub>FH</sub>), C) % CXCR5<sup>+</sup>PD-1<sup>+</sup> (T<sub>FH</sub>) and D) % Fas<sup>+</sup>GL7<sup>+</sup> (GC B cells). E-G) Splenocytes were restimulated with GP-64 and BFA for 4h and investigated for T<sub>H1</sub> phenotype, pre-gated on viable CD3<sup>+</sup>CD4<sup>+</sup> cells. Shown are 2-3 independent experiments with 3-4 biological replicates per group. E) representative FACS plots of Tbx21 and IFN $\gamma$  expression F) quantification of relative numbers of Tbx21<sup>+</sup>IFN $\gamma$ <sup>+</sup> CD3<sup>+</sup>CD4<sup>+</sup> cells. G) ratio of Tbx21<sup>+</sup>IFN $\gamma$ <sup>+</sup> to total Tbx21<sup>+</sup> cells. Error bars represent mean with SD, Dunn's multiple comparison test, p values: ns=not significant, \*<0.0332, \*\*<0.0021, \*\*\*<0.0002, \*\*\*\*<0.0001.

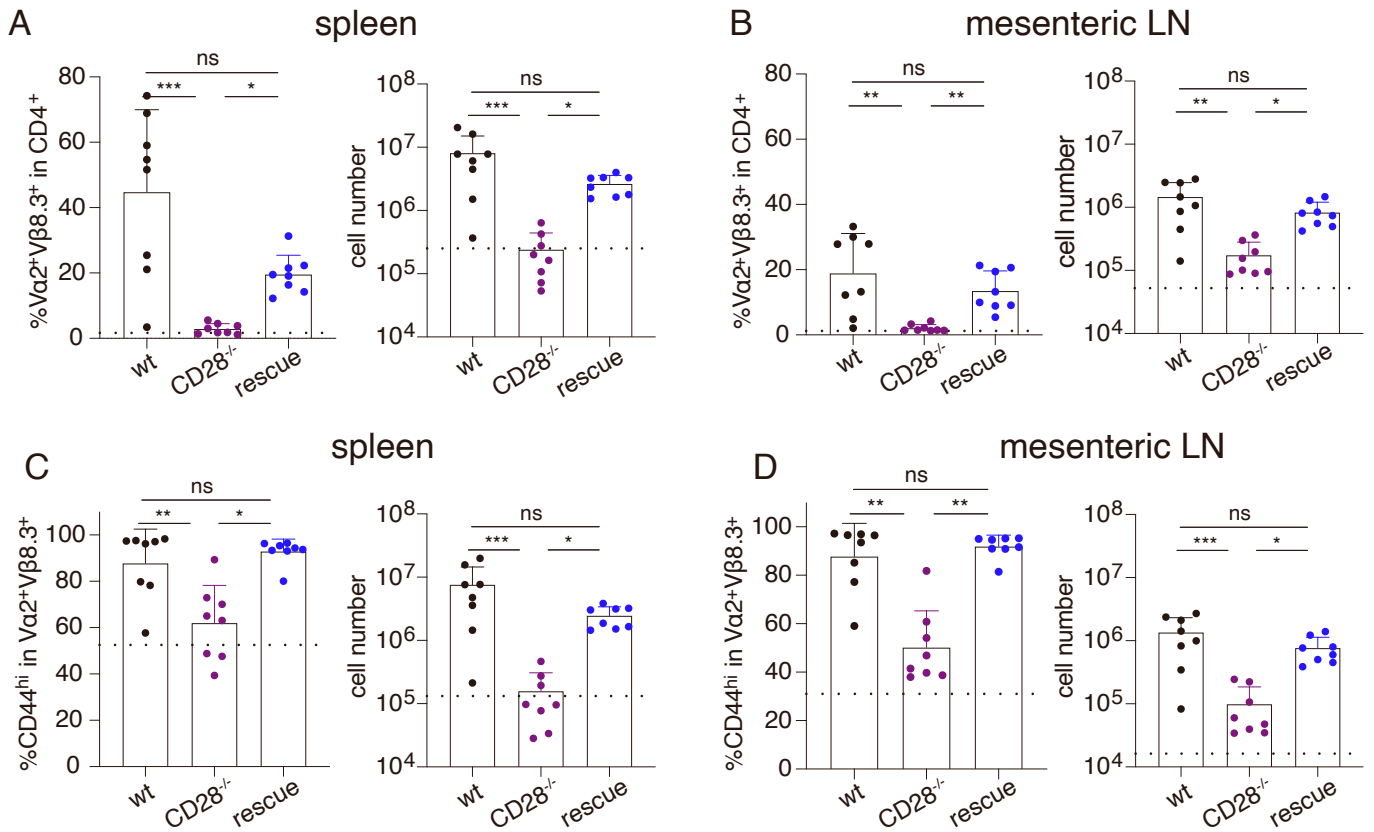

**Figure S3. Restoration of T cell activation of CD28-deficient T cells by miR-17~92 is cell intrinsic, Related to Figure 3**

Adoptive transfer of naïve SMARTA<sup>+</sup> CD4<sup>+</sup> T cells into CD28<sup>-/-</sup> hosts, subsequent LCMV Armstrong infection and analysis of organs at d8 post infection. Donor genotypes wt (black), CD28<sup>-/-</sup> (purple), rescue (dark blue). Dotted line indicates recipient's intrinsic Va2<sup>+</sup>Vβ8.3<sup>+</sup> population measured in a non-transferred host. Va2<sup>+</sup>Vβ8.3<sup>+</sup> cells in viable CD4<sup>+</sup> population from spleen (A) and mesenteric LN (B). CD44 expression in Va2<sup>+</sup>Vβ8.3<sup>+</sup> population from spleen (C) and mesenteric LN (D). 2 independent experiments, 4 recipients per group. Error bars represent mean ±SD, Dunn's multiple comparison test, p values: ns=not significant, \*<0.05, \*\*<0.002, \*\*\*<0.0002.

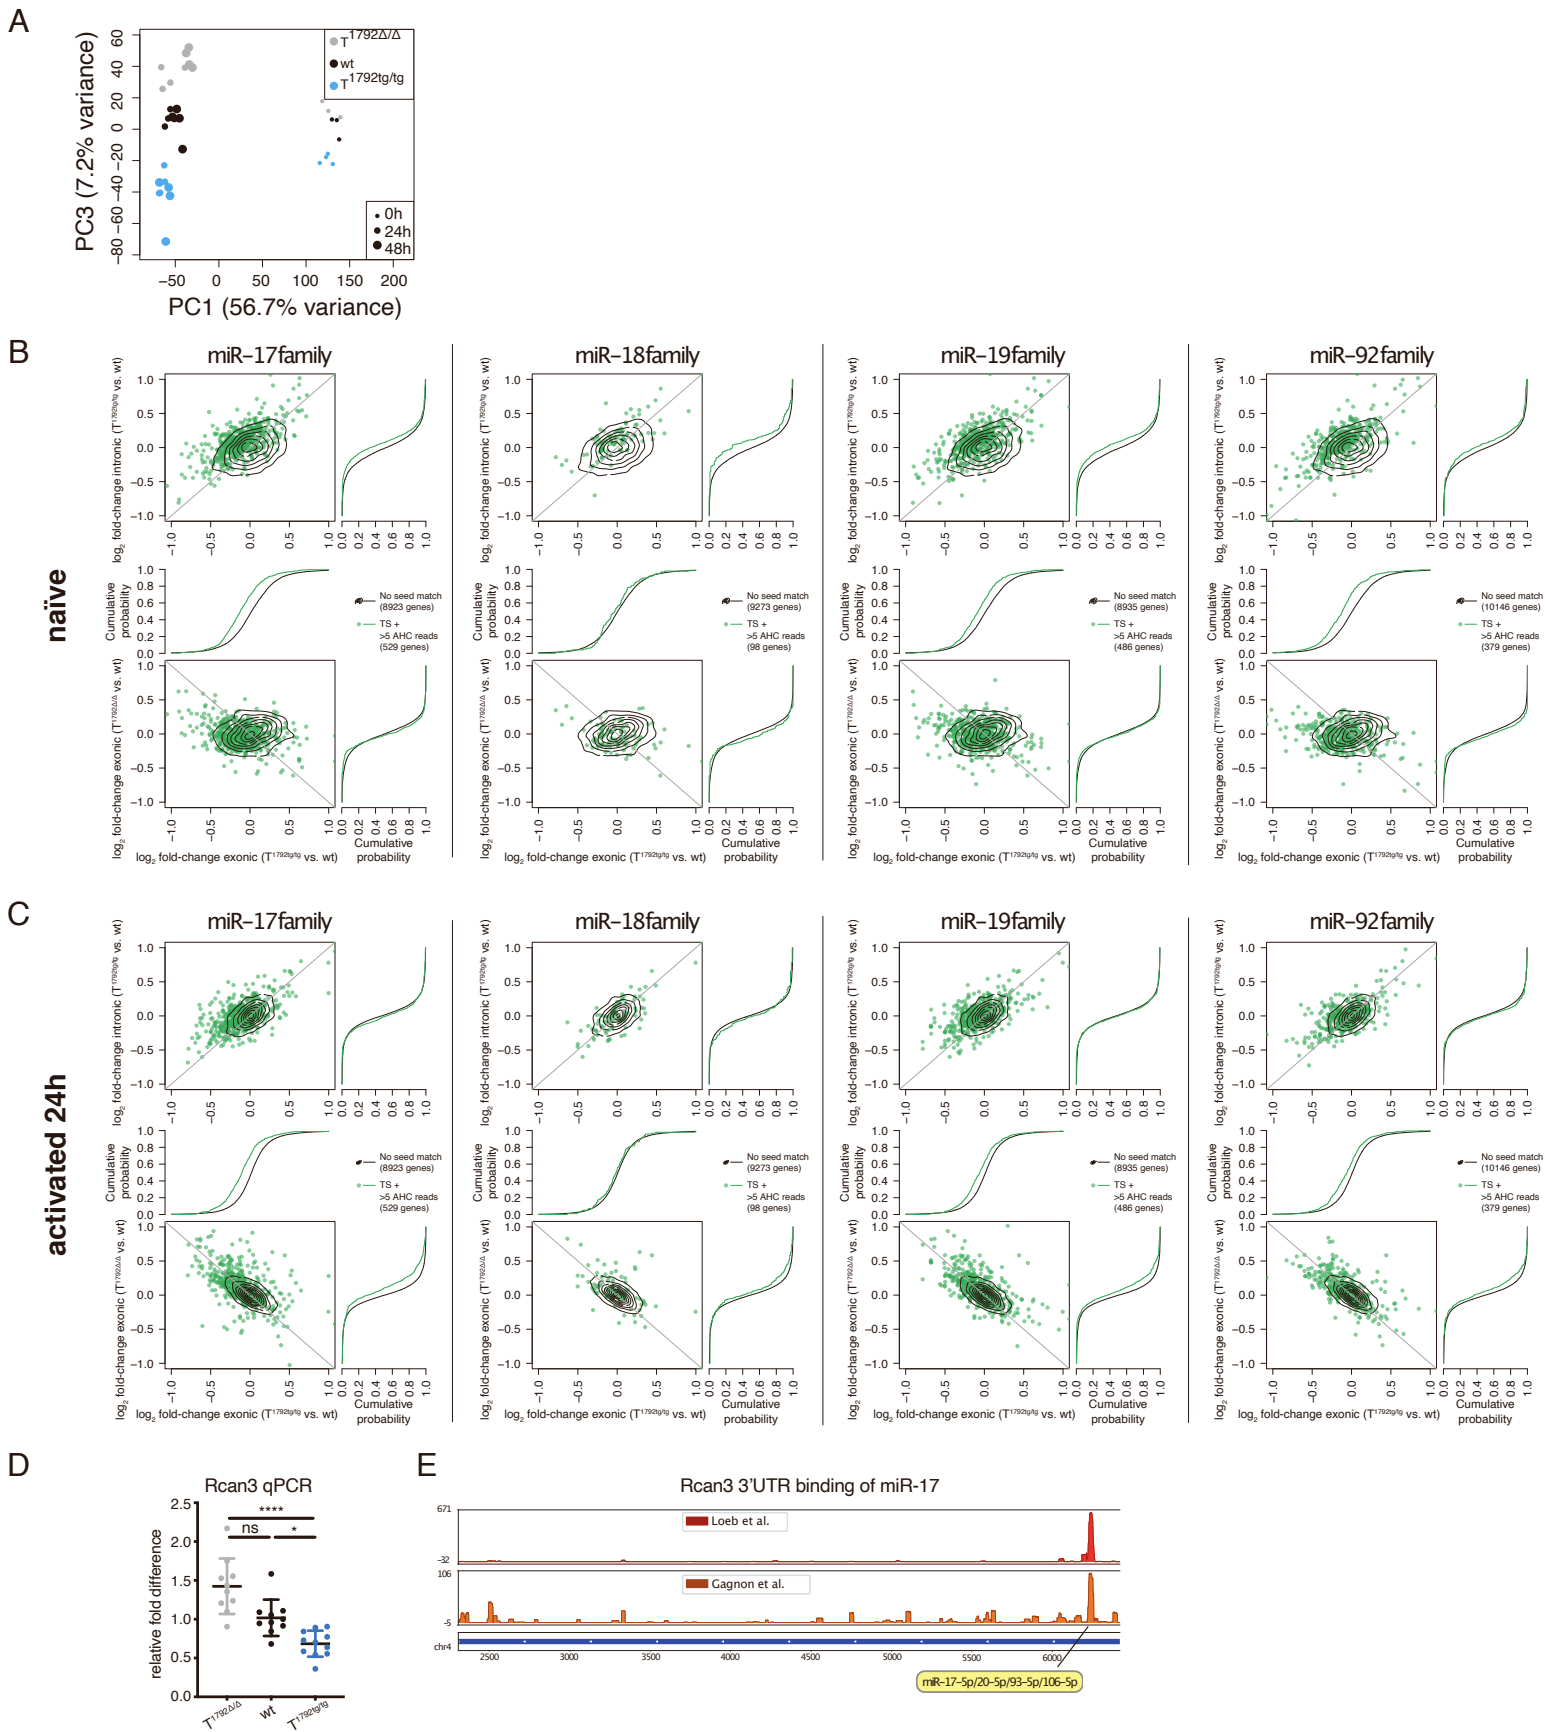

**Figure S4. MiR-17~92 shapes the transcriptome after CD4+ T cell activation, Related to Figure 4**

Naïve CD4+ T cells from  $T^{1792\Delta/\Delta}$  (grey), wt (black) and  $T^{1792tg/tg}$  (light blue) mice were activated with plate-bound  $\alpha$ CD28 and  $\alpha$ CD3 mAbs for 0, 24h and 48h. Total RNA was extracted for bulk sequencing. A) PCA (PC1 vs. PC3) based on the 25% most variable genes. B, C) For each seed family, dot plots compare the  $\log_2$  value of the exonic expression ratio for each gene in  $T^{1792tg/tg}$  vs. wt (x-axis) versus either exonic expression ratio for each gene in  $T^{1792\Delta/\Delta}$  vs. wt comparison on the y-axis (bottom row) or intronic expression ratio for each gene in  $T^{1792tg/tg}$  vs. wt (top row) in naïve (B) and 24h post activation (C). Each ratio is compared to the cumulative fraction of all  $\log_2$  ratios in the corresponding comparison. Black curve: all genes of our data set without a seed match and  $\leq 5$  AHC reads; green: subset of genes with a seed sequence for the indicated seed family and  $>5$  reads in the AHC. D) Rcan3 mRNA expression detected by qPCR 24h after activation; shown are pooled data from three independent experiments, normalized to wt.  $T^{1792\Delta/\Delta}$  (grey), wt (black),  $T^{1792tg/tg}$  (light blue). mRNA expression normalized to 18S rRNA. Values are means  $\pm$ SD, Dunn's multiple comparison test, p values: ns=not significant,  $* < 0.05$   $**** < 0.0001$ . E) Binding sites of Argonaute 2 in 3'UTR of Rcan3 detected by HITS-CLIP; predicted miR17 binding site indicated by yellow flag. See also Suppl. Table S1.

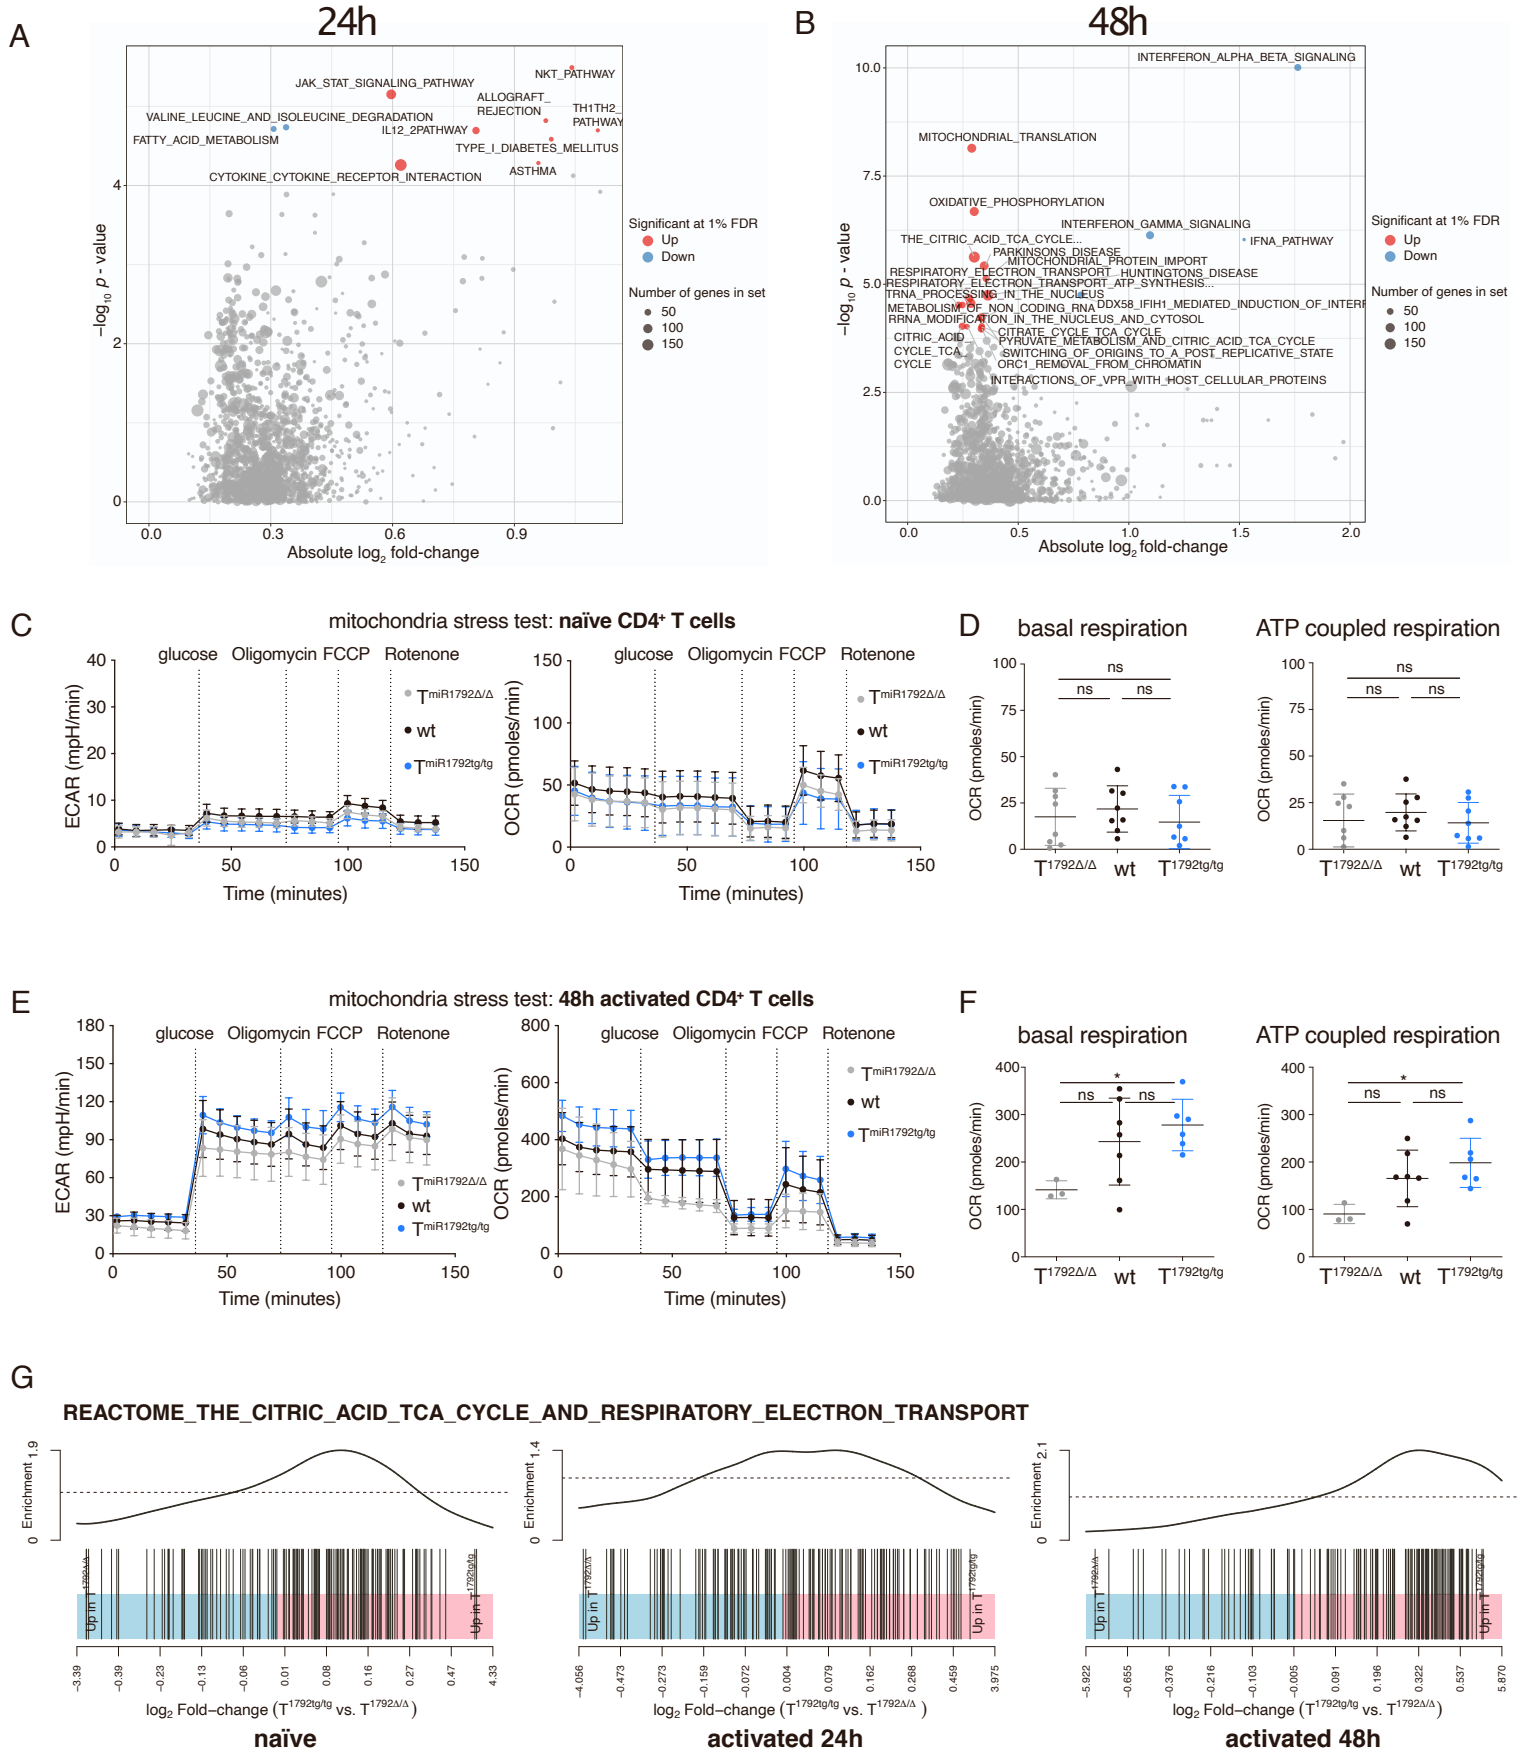

**Figure S5. MiR-17~92 expression modifies metabolism in activated CD4<sup>+</sup> T cells after 48h, Related to Figure 5**

A, B) Naïve CD4<sup>+</sup> T cells from T<sup>1792Δ/Δ</sup>, wt and T<sup>1792tg/tg</sup> mice were activated with plate-bound αCD28 and αCD3 mAbs for 24h and 48h. Total RNA was extracted for sequencing. Volcano plot of GSEA pathway (KEGG, REACTOME, PID, BIOCARTA) enrichment for genes differentially expressed after 24h (A) and 48h (B) activation between T<sup>1792Δ/Δ</sup> and T<sup>1792tg/tg</sup>. Red dots indicate pathway enriched for genes up regulated whereas blue dots are pathways enriched for down regulated genes. Only significantly enriched pathways (1% FDR) are colored. Dot width indicates the gene set size for each pathway. C-G) CD4<sup>+</sup> T cells from T<sup>1792Δ/Δ</sup> (grey), wt (black), T<sup>1792tg/tg</sup> (light blue) were assessed for their metabolic activity by mitochondria stress test with the Seahorse machine. C) Mitochondria stress test measured with a 96-well Seahorse in naïve CD4<sup>+</sup> T cells. 2 experiments with 3-4 biological replicates per group and experiment are shown. D) Basal respiration and ATP coupled respiration in naïve CD4<sup>+</sup> T cells. E) Mitochondria stress test measured in CD4<sup>+</sup> T cells activated for 48h. F) Basal respiration and ATP coupled respiration in activated CD4<sup>+</sup> T cells. Pooled 3-8 biological replicates from 4 experiments are shown. Tukey's multiple comparison test, p values: \* < 0.05. G) RNA sequencing data shows an enrichment of genes associated with TCA. Shown is gene set REACTOME\_TCA\_CYCLE\_AND\_RESPIRATORY\_ELECTRON\_TRANSPORT enrichment with genes differentially expressed between T<sup>1792Δ/Δ</sup> and T<sup>1792tg/tg</sup> in naïve, 24h and 48h post activation. Colors indicate fold change direction with blue being upregulated in T<sup>1792Δ/Δ</sup> and red downregulated.

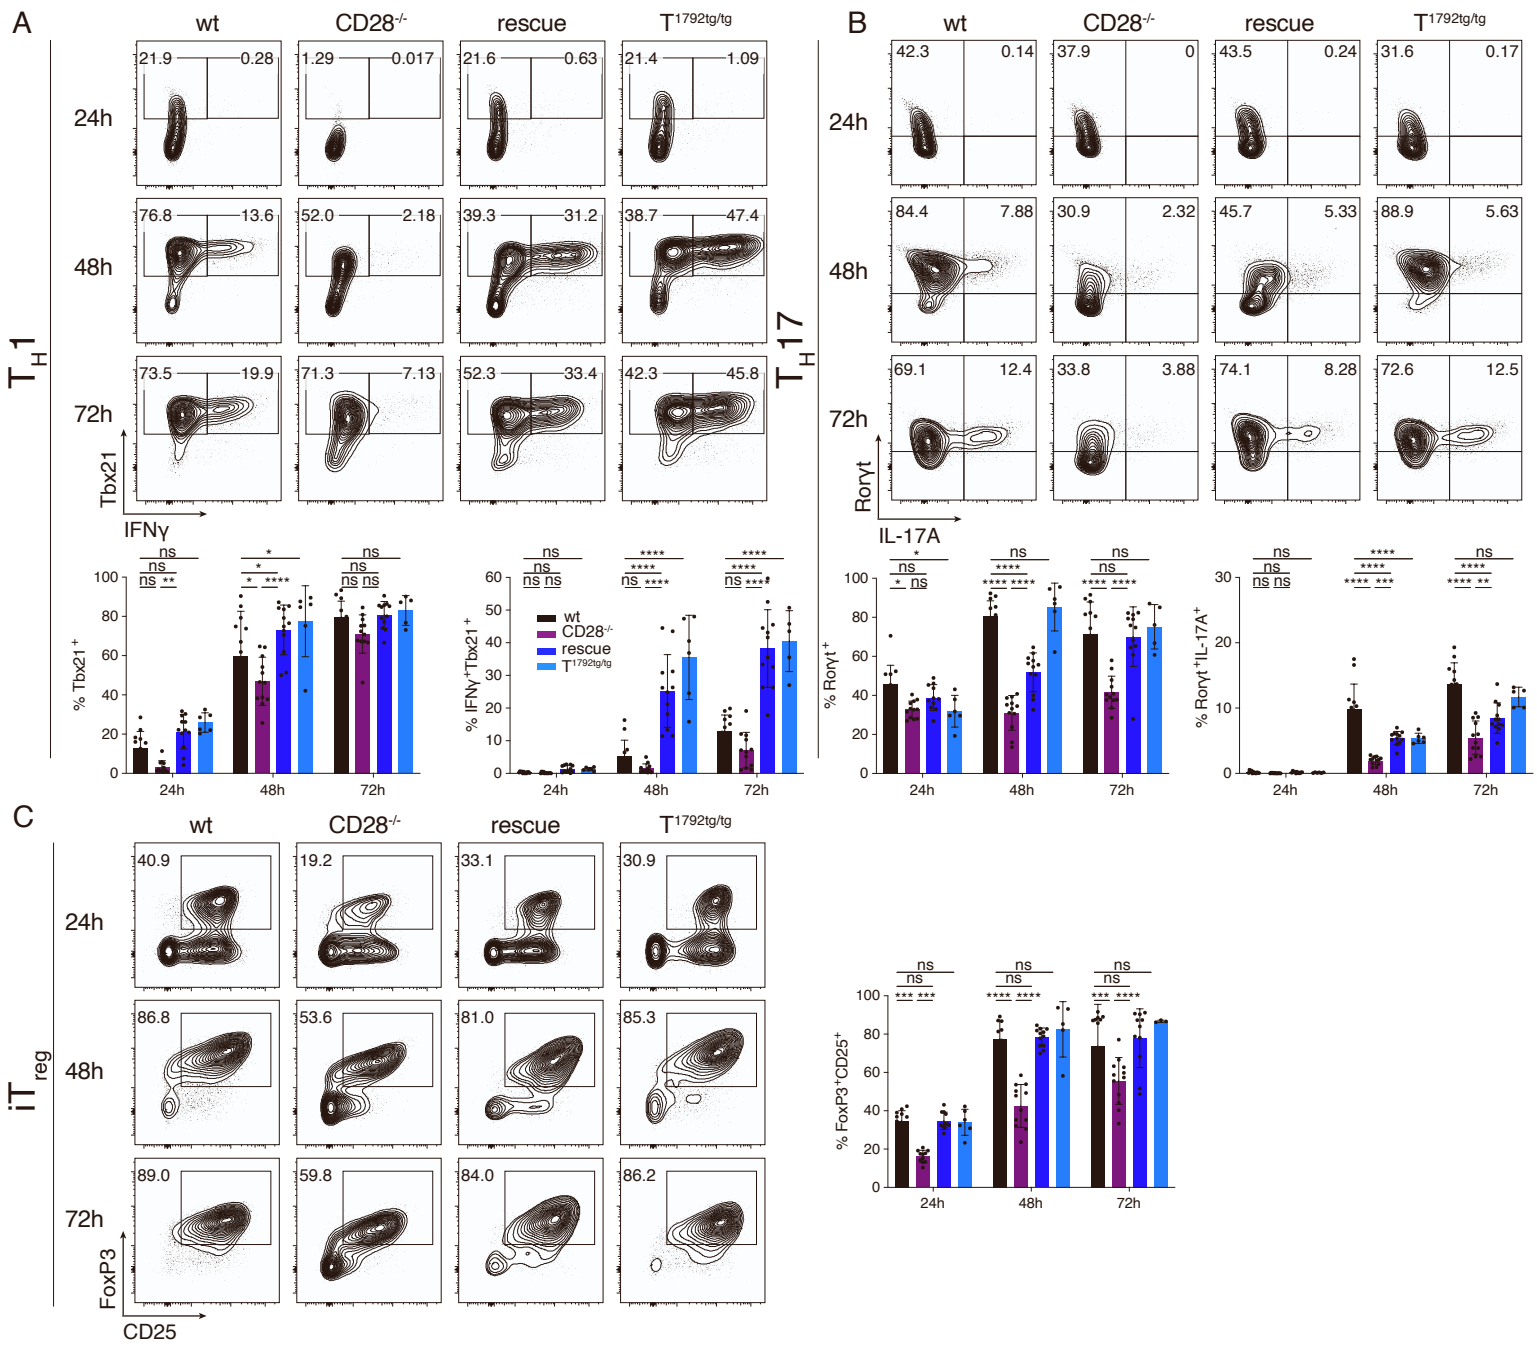

**Figure S6. Transgenic miR-17~92 functionally corrected the defects of CD28<sup>-/-</sup> T cells to differentiate into TH1, TH17 and iTreg in vitro, Related to Figure 5**  
 Naïve CD4<sup>+</sup> T cells were activated for 24h, 48h, and 72h with plate-bound anti-CD28 and anti-CD3 under in vitro skewing conditions for T<sub>H1</sub>, T<sub>H17</sub>, and iT<sub>reg</sub> differentiation. wt (black), CD28<sup>-/-</sup> (purple), rescue (dark blue) and T<sup>1792tg/tg</sup> (light blue). A) T<sub>H1</sub> differentiation assessed by IFN $\gamma$ /Tbx21 staining in viable CD4<sup>+</sup> T cells B) T<sub>H17</sub> differentiation assessed by IL-17A/Ror $\gamma$ t staining in viable CD4<sup>+</sup> T cells C) iT<sub>reg</sub>s characterized by CD25/ Foxp3 expression. Data from 2 independent experiments.

A

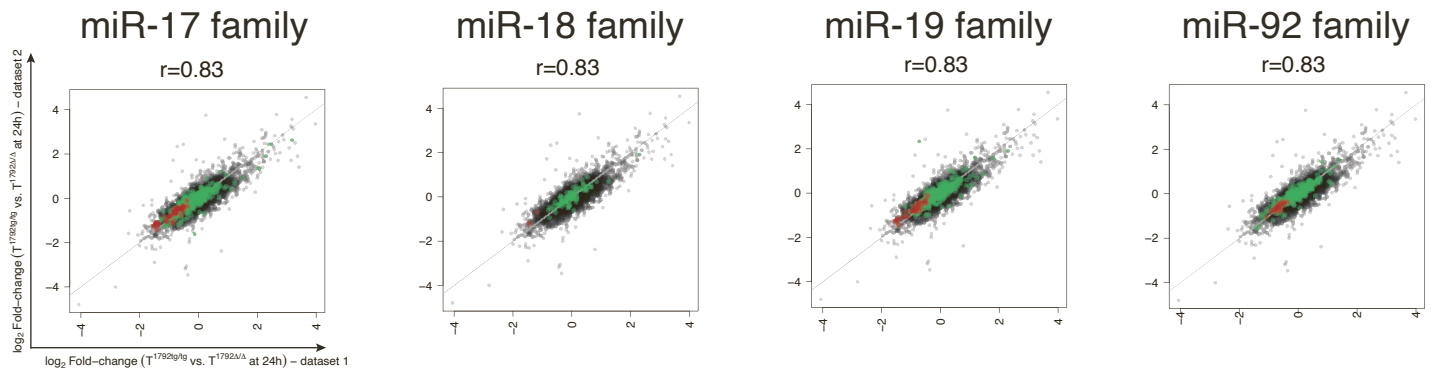

B

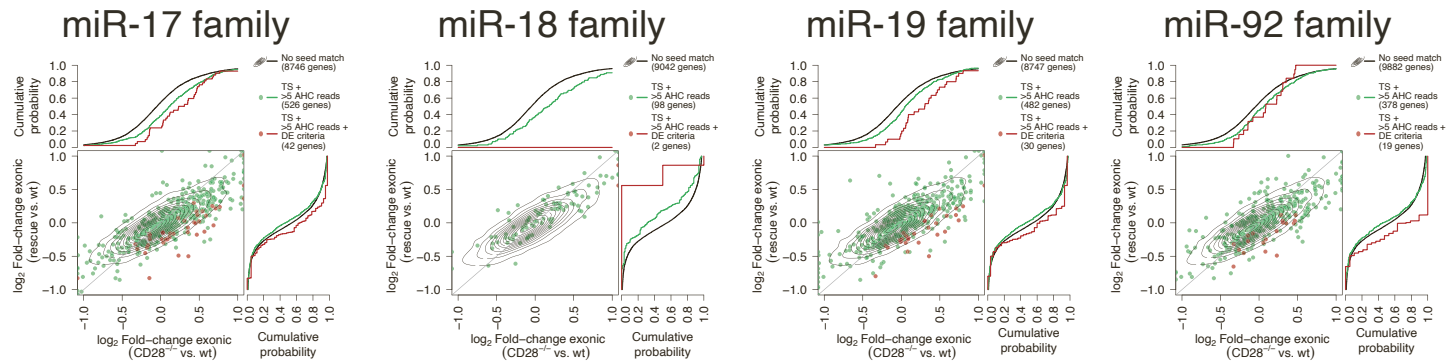

**Figure S7. All miR-17~92 seed families are necessary for CD28-induced gene repression, Related to Figure 6**

Total RNA was extracted for sequencing from CD4<sup>+</sup> T cells. A) Correlation of gene expression levels between RNA-seq experiment 1 (Fig. 4) and 2 (Fig. 6). Black: genes without seed match, <5 AHC reads and no differential expression in the second RNA sequencing. Green: genes with a conserved binding site for each indicated seed family and >5 reads in the AHC; red: genes with a conserved binding site for each indicated seed family, >5 reads in the AHC and differential expression in the second RNA sequencing data set. B) For each seed family, dot plots compare the log<sub>2</sub> value of the exonic expression ratio for each gene in the CD28<sup>-/-</sup> vs. wt comparison (x-axis) versus the exonic expression ratio for each gene in rescue vs. wt (y-axis) in CD4<sup>+</sup> T cells 24h post activation. Each ratio is compared to the cumulative fraction of all log<sub>2</sub> ratios in the corresponding comparison. Black curve: all genes of our data set without a seed match and five or less AHC reads; green: subset of genes with a seed sequence for the indicated seed family (TS) and >5 reads in the AHC; red: genes with a conserved binding site for the corresponding seed family (TS), >5 reads in the AHC and differential expression in the second RNA sequencing data set.



**Table S2.** List of genes rescued by miR-17~92 expression, Related to **Figure 5**

List of genes in which “rescue” T cells were more similar to wt and T<sup>1792tg/tg</sup> cells than CD28<sup>-/-</sup> and T<sup>1792Δ/Δ</sup> cells. Corresponds to genes in box in figure 7D.

| Gene name |
|-----------|
| Tgtp2     |
| Gbp6      |
| Mir6974   |
| Oaf       |
| Smim3     |
| AW112010  |
| Coro2a    |
| Slco3a1   |
| Tspan9    |
| Ly6a      |
| H2-Q6     |
| Slc13a3   |
| Atf3      |
| Cacnb3    |
| Casp1     |
| Casp4     |
| Runx2     |
| Cd44      |
| Socs1     |
| Cxcr3     |
| Ccr5      |
| Eomes     |
| H2-T23    |
| Hbegf     |
| Icam1     |
| Irgm1     |
| Cxcl10    |
| Ifng      |
| Igtp      |
| Il12a     |
| Il12rb2   |
| Il4       |
| Ajuba     |
| Cxcl9     |
| Gbp4      |
| Penk      |
| Ppic      |
| Ptger3    |
| Eil2      |
| Rab20     |
| Rpl29     |

|               |
|---------------|
| Sox5          |
| Serpinb6b     |
| Serpina3g     |
| Serpinb9      |
| Stra6         |
| Tcf4          |
| Fam26f        |
| Tgtp1         |
| Soat2         |
| Xlr3c         |
| Gm4841        |
| C1ql3         |
| Ppp1r16b      |
| Gbp7          |
| Asap3         |
| Picalm        |
| Ccdc102a      |
| Serpina3f     |
| Gadd45g       |
| Mgll          |
| Gm4951        |
| Ubd           |
| Ehd2          |
| Insl6         |
| Batf3         |
| Gm996         |
| Rnf225        |
| Brsk1         |
| Mir18         |
| Mir20a        |
| AA467197      |
| Dlc1          |
| Irgm2         |
| Gbp3          |
| Espn          |
| Ube2l6        |
| Ly6i          |
| ligp1         |
| Il21          |
| Gm12185       |
| Gbp10         |
| Gm12250       |
| 4930428O21Rik |
| Fkbp11        |
| Tma7          |
| Arrdc4        |
| Tmem35a       |
| Fam212a       |

|          |
|----------|
| Tln2     |
| Zbtb46   |
| Mir17    |
| Nuak2    |
| Rnf19b   |
| Abhd14b  |
| Syt13    |
| Trps1    |
| Tnfrsf25 |
| Gm1966   |
| Gm8989   |
| Il10ra   |
| Zbp1     |
| Gbp8     |
| Tgfbr3   |
| Nckap5l  |
| Gprin3   |
| Gm18853  |
| Gvin1    |
| Ptprn    |
| Parp3    |
| Cysltr2  |
| H2-DMa   |
